# Supplementary material for: Characterization of the damping and mechanical properties of a novel (ZnSnO3/PVDF)@PPy nanofibers/EP composite
Source: Royal Society of Chemistry journal article supplement (doi:10.1039/c7ra06328h), 2017-01-01
Supplement: c7ra06328h1.pdf [file c7ra06328h1.pdf]

### Supporting Information

| Sample                                                                             | Storage modulus (E') (MPa) | Loss modulus (E'') (MPa) | Maximum loss factor (tanδ <sub>max</sub> ) at room temperature | T <sub>g</sub> (°C) | Temperature range (°C)/ tanδ>0.3 (ΔT) | Piezoelectric coefficient (d <sub>33</sub> ) of the piezoelectric phase (pC/N) |
|------------------------------------------------------------------------------------|----------------------------|--------------------------|----------------------------------------------------------------|---------------------|---------------------------------------|--------------------------------------------------------------------------------|
| PZT/carbon fiber(CF)/epoxy resin (EP) <sup>[1]</sup>                               | *                          | *                        | 0.02                                                           | *                   | *                                     | 600 <sup>[8]</sup>                                                             |
| ZnO nanorod/carbon fiber (CF)/epoxy resin (EP) <sup>[2]</sup>                      | 21200                      | 318                      | 0.015                                                          | *                   | *                                     | 12.4 <sup>[9]</sup>                                                            |
| PZT/carbon black (CB)/epoxy resin (EP) <sup>[3]</sup>                              | *                          | *                        | 0.078                                                          | *                   | *                                     | 600 <sup>[8]</sup>                                                             |
| PZT/Fe/polydimethylsiloxane (PDMS) <sup>[4]</sup>                                  | 0.25                       | 0.05                     | 0.2                                                            | *                   | *                                     | 600 <sup>[8]</sup>                                                             |
| PZT/carbon nanotubes(CNT)/Polyamide 11 (PA 11) <sup>[5]</sup>                      | 14500                      | 260                      | 0.018                                                          | *                   | *                                     | 600 <sup>[8]</sup>                                                             |
| PZT/multi-walled carbon nanotubes (CNT)/epoxy resin (EP) <sup>[6]</sup>            | *                          | *                        | 0.2                                                            | *                   | *                                     | 600 <sup>[8]</sup>                                                             |
| BaTiO <sub>3</sub> /carbon fiber(CF)/chlorinated polyethylene (CPE) <sup>[7]</sup> | 250                        | 67.5                     | 0.27                                                           | *                   | *                                     | 42 <sup>[10]</sup>                                                             |
| (ZnSnO <sub>3</sub> /PVDF)@PPy nanofibers/epoxy resin (EP) <sup>(this work)</sup>  | 6261.6                     | 522.6                    | 0.083                                                          | 117.3               | 102.6-135.2 (32.6)                    | 51                                                                             |

\*Not given

### References

- 1 T. Tanimoto, *Compos. Sci. Technol.*, 2007, **67**, 213-221.
- 2 A. A. Skandani, N. Masghouni, S. W. Case, D. J. Leo and M. Al-Haik, *Appl. Phys. Lett.*, 2012, **101**, 073111.
- 3 M. Hori, T. Aoki, Y. Ohira and S. Yano, *Compos. Part A - Appl. S.*, 2001, **32**, 287-290.
- 4 S. K. Sharma, H. Gaur, M. Kulkarni, G. Patil, B. Bhattacharya and A. Sharma, *Compos. Sci. Technol.*, 2013, **77**, 42-51.
- 5 D. Carponcin, E. Dantras, G. Michon, J. Dandurand, G. Aridon, F. Levallois, L. Cadiergues and C. Lacabanne, *J. Non-Cryst. Solids*, 2015, **409**, 20-26.
- 6 S. Tian, F. Cui and X. Wang, *Mater. Lett.*, 2008, **62**, 3859-3861.
- 7 C. Zhang, J. F. Sheng, C. A. Ma and M. Sumita, *Mater. Lett.*, 2005, **59**, 3648-3651.
- 8 D. Xu, X. Cheng, X. Guo and S. Huang, *Constr. Build. Mater.*, 2015, **84**, 219-223.
- 9 D. Karanth and H. Fu, *Phys. Rev. B*, 2005, **72**, 064116.
- 10 J. Shi, I. Grinberg, X. Wang and A. M. Rappe, *Phys. Rev. B*, 2014, **89**, 094105.
